# Supplementary material for: Integration of RRBS and RNA-seq unravels the regulatory role of DNMT3A in porcine Sertoli cell proliferation
Source: Front Genet. 2024 Jan 9;14:1302351. doi: 10.3389/fgene.2023.1302351 (PMC10803568; doi:10.3389/fgene.2023.1302351)
Supplement: Supplementary file 15 [file Table7.XLS]

## Sheet: Sheet1
Information of overlapping genes between DEGs and DMGs
Gene ID	diff.Methy	region	Gene Symbol	log2FoldChange
100627260	0.164223	intron	TULP4	363.012
100156689	0.252151	intron	COL12A1	3680.83
100156280	-0.148045	exon	GREM1	368.811
100152847	0.112909	exon	SKOR1	231.884
100513970	0.100063	intron	RALGDS	593.556
100517712	0.111221	exon	LOC100517712	411.071
100156430	-0.0523672	promoter	SLC6A17	35.7645
106508363	-0.324042	intron	LOC106508363	1.03835
100157216	0.0436213	promoter	WWC3	1577.25
100625006	0.0897297	intron	APLN	171.116
445520	-0.142546	exon	TNXB	689.268
100154621	0.38508	intron	KCTD20	1062.29
100627339	-0.144057	exon	TTC9	489.065
100511141	-0.0525166	intron	VASH1	825.112
100126286	-0.0234778	promoter	KRT18	1191.81
100514349	-0.0580782	exon	FAM234B	147.244
445464	0.165658	intron	C1R	278.231
100624042	-0.0756173	intron	SACS	7837.43
100518447	0.171718	intron	MCF2L	969.768
106506677	-0.160709	intron	CTNNBL1	1463.66
100620808	0.057587	intron	STXBP5L	8.83054
100627365	-0.0860804	intron	CPNE2	756.377
100738544	0.0714201	exon	ERRFI1	829.703
100514237	0.138109	intron	VPS13D	892.674
100518559	0.0423458	intron	PRDM2	366.681
100522875	0.149256	exon	EMILIN2	795.291
100512112	0.160901	intron	MAST2	2300.08
100511737	-0.0656964	exon	C2H11orf95	1000.56
100521067	0.342227	intron	NAV2	495.478
102157525	-0.278884	exon	OBSCN	2443.65
100174959	0.0587509	exon	KLF2	1450.48
100152269	-0.210706	intron	FBRSL1	1054.04
100622637	0.197531	intron	NRP2	652.476
100499566	0.374578	intron	DNAJB13	222.391
100738830	0.111529	exon	NRGN	252.189
100624699	-0.0896922	intron	ZNF518B	579.835
397453	0.190496	intron	ADAP1	768.504
100622994	0.0434522	exon	MAZ	5814.16
397382	0.467918	promoter	MUC1	60.0287
100515873	-0.0722302	promoter	SEPT6	606.428
100622968	-0.279311	promoter	DUSP6	2670.25
100511276	0.0856586	promoter	NOL6	1617.84
654291	0.0490582	promoter	SLC2A4RG	1611.84
110255990	0.44946	promoter	LOC110255990	51.237
100511356	0.516239	promoter	NOM1	1641.5
733617	0.317372	promoter	MCAM	904.849
100624755	-0.129388	promoter	NFRKB	1619.56
100620143	-0.0781589	promoter	C3H2orf68	1082.39
